# Supplementary material for: TNF Induces Pathogenic Programmed Macrophage Necrosis in Tuberculosis through a Mitochondrial-Lysosomal-Endoplasmic Reticulum Circuit
Source: PubMed Central journal article supplement (PMC6736209; doi:10.1016/j.cell.2019.08.004), 2019-09-05
Supplement: mmc1.pdf [file mmc1.pdf]

**Cell, Volume 178**

**Supplemental Information**

**TNF Induces Pathogenic Programmed Macrophage  
Necrosis in Tuberculosis through a Mitochondrial-  
Lysosomal-Endoplasmic Reticulum Circuit**

**Francisco J. Roca, Laura J. Whitworth, Sarah Redmond, Ana A. Jones, and Lalita Ramakrishnan**

## SUPPLEMENTAL DATA TITLES AND LEGENDS

**Table S1 (related to Figure 4 and Figure 7).** Expression of ryanodine receptor isoforms in human macrophages and zebrafish blood monocytes.

| HUMAN   |                                                                                                                                                      | ZEBRAFISH |                                                              |
|---------|------------------------------------------------------------------------------------------------------------------------------------------------------|-----------|--------------------------------------------------------------|
| Homolog | Expression                                                                                                                                           | Homolog   | Expression in blood mfap4+ cells (Athanasiadis et al., 2017) |
| RyR1    | Macrophages:<br>(EMBL-EBI expression atlas)<br>THP1:<br>Protein Atlas<br>( <a href="https://www.proteinatlas.org">https://www.proteinatlas.org</a> ) | RyR1a     | Yes (high)                                                   |
|         |                                                                                                                                                      | RyR1b     | nd                                                           |
| RyR2    | <a href="http://www.proteinatlas.org">Lung macrophages</a><br>( <a href="http://www.proteinatlas.org">www.proteinatlas.org</a> )                     | RyR2a     | nd                                                           |
|         |                                                                                                                                                      | RyR2b     | Yes (high)                                                   |
| RyR3    | No data available                                                                                                                                    | RyR3      | <a href="#">Yes (low)</a>                                    |

**Table S2 (related to Figure 7).** THP-1 macrophage death (%) in all experiments.

| <u>Experiment Code</u> | <u>UNINFECTED WELL, NO TNF</u> | <u>UNINFECTED WELL, +TNF</u> | <u>UNINFECTED CELLS, NO TNF</u> | <u>INFECTED CELLS, NO TNF</u> | <u>UNINFECTED CELLS, +TNF</u> | <u>INFECTED CELLS, +TNF</u> | <u>INF+TNF/INF-TNF</u> | <u>INF+TNF/Uninf+TNF within well ratio</u> | <u>UNINF+TNF/UNINF-TNF (ALL UNINFECTED WELLS)</u> | <u>INF-TNF/UNINF-TNF within well ratio</u> | <u>UNINF+TNF/UNINF-TNF</u> | <u>J/L</u>  | <u>I/M</u>  |
|------------------------|--------------------------------|------------------------------|---------------------------------|-------------------------------|-------------------------------|-----------------------------|------------------------|--------------------------------------------|---------------------------------------------------|--------------------------------------------|----------------------------|-------------|-------------|
| UWS003                 | 0.70                           | 1.40                         | 16.00                           | 11.10                         | 14.00                         | 47.60                       |                        | 3.40                                       |                                                   | 0.69                                       |                            |             |             |
|                        | 0.60                           | 0.60                         | 12.70                           | 4.70                          | 15.60                         | 30.70                       |                        | 1.97                                       |                                                   | 0.37                                       |                            |             |             |
| <i>mean</i>            | <i>0.65</i>                    | <i>1.00</i>                  | <i>14.35</i>                    | <i>7.90</i>                   | <i>14.80</i>                  | <i>39.15</i>                | <i>4.96</i>            | <b>2.68</b>                                | <i>1.54</i>                                       | <i>0.53</i>                                | <i>1.03</i>                | <i>5.05</i> | <i>4.81</i> |
| UWS004                 | 7.71                           | -                            | 12.90                           | 13.73                         | 13.04                         | 24.60                       |                        | 1.89                                       |                                                   | 1.06                                       |                            |             |             |
|                        | 6.46                           | -                            | 9.68                            | 11.85                         | 4.00                          | 22.54                       |                        | 5.64                                       |                                                   | 1.22                                       |                            |             |             |
| <i>mean</i>            | <i>7.09</i>                    | <i>-</i>                     | <i>11.29</i>                    | <i>12.79</i>                  | <i>8.52</i>                   | <i>23.57</i>                | <i>1.84</i>            | <b>3.76</b>                                | <i>n/a</i>                                        | <i>1.14</i>                                | <i>0.75</i>                | <i>3.29</i> | <i>2.44</i> |
| CMB008                 | 14.25                          | 12.00                        | 9.26                            | 13.53                         | 27.76                         | 35.67                       |                        | 1.28                                       |                                                   | 1.46                                       |                            |             |             |
|                        | -                              | -                            | -                               | -                             | 12.09                         | 31.29                       |                        | 2.59                                       |                                                   |                                            |                            |             |             |
| <i>mean</i>            | <i>-</i>                       | <i>-</i>                     | <i>-</i>                        | <i>-</i>                      | <i>19.93</i>                  | <i>33.48</i>                | <i>2.47</i>            | <b>1.94</b>                                | <i>0.84</i>                                       |                                            | <i>2.15</i>                | <i>1.33</i> | <i>1.15</i> |
| CMB010                 | 6.96                           | 7.03                         | 11.11                           | 16.67                         | 11.20                         | 46.81                       |                        | 4.18                                       |                                                   | 1.50                                       |                            |             |             |
|                        | 11.62                          | 12.23                        | 9.20                            | 18.46                         | 14.34                         | 39.33                       |                        | 2.74                                       |                                                   | 2.01                                       |                            |             |             |
|                        | 7.00                           | 16.14                        | 17.48                           | 18.42                         | 27.96                         | 57.53                       |                        | 2.06                                       |                                                   | 1.05                                       |                            |             |             |
| <i>mean</i>            | <i>8.53</i>                    | <i>11.80</i>                 | <i>12.60</i>                    | <i>17.85</i>                  | <i>17.83</i>                  | <i>47.89</i>                | <i>2.68</i>            | <b>2.99</b>                                | <i>1.38</i>                                       | <i>1.52</i>                                | <i>1.42</i>                | <i>1.97</i> | <i>1.90</i> |
| CMB018                 | 5.90                           | 11.31                        | 7.97                            | 7.88                          | 30.47                         | 48.84                       |                        | 1.60                                       |                                                   | 0.99                                       |                            |             |             |
|                        | 9.67                           | 9.61                         | 9.41                            | 8.64                          | 11.23                         | 27.91                       |                        | 2.49                                       |                                                   | 0.92                                       |                            |             |             |
| <i>mean</i>            | <i>7.79</i>                    | <i>10.46</i>                 | <i>8.69</i>                     | <i>8.26</i>                   | <i>20.85</i>                  | <i>38.38</i>                | <i>4.65</i>            | <b>2.04</b>                                | <i>1.34</i>                                       | <i>0.95</i>                                | <i>2.40</i>                | <i>2.14</i> | <i>1.94</i> |
| CMB019                 | 6.58                           | 7.46                         | 8.04                            | 5.10                          | 13.27                         | 34.31                       |                        | 2.59                                       |                                                   | 0.63                                       |                            |             |             |
|                        | 8.41                           | 19.75                        | 13.81                           | 16.20                         | 15.70                         | 30.41                       |                        | 1.94                                       |                                                   | 1.17                                       |                            |             |             |
| <i>mean</i>            | <i>7.50</i>                    | <i>13.61</i>                 | <i>10.93</i>                    | <i>10.65</i>                  | <i>14.49</i>                  | <i>32.36</i>                | <i>3.04</i>            | <b>2.26</b>                                | <i>1.82</i>                                       | <i>0.90</i>                                | <i>1.33</i>                | <i>2.50</i> | <i>2.29</i> |
| CMB021                 | 13.16                          | 8.13                         | 9.33                            | 3.73                          | 14.38                         | 10.81                       |                        | 0.75                                       |                                                   | 0.40                                       |                            |             |             |
|                        | 11.05                          | 8.98                         | 20.73                           | 5.26                          | 20.78                         | 13.98                       |                        | 0.67                                       |                                                   | 0.25                                       |                            |             |             |
|                        | 7.82                           | 13.15                        | 13.38                           | 7.69                          | 24.62                         | 13.43                       |                        | 0.55                                       |                                                   | 0.57                                       |                            |             |             |
| <i>mean</i>            | <i>10.68</i>                   | <i>10.09</i>                 | <i>14.48</i>                    | <i>5.56</i>                   | <i>19.93</i>                  | <i>12.74</i>                | <i>2.29</i>            | <b>0.66</b>                                | <i>0.94</i>                                       | <i>0.41</i>                                | <i>1.38</i>                | <i>1.60</i> | <i>1.67</i> |
| CMB029                 | 25.58                          | 28.79                        | 19.80                           | 25.00                         | 30.25                         | 32.26                       |                        | 1.07                                       |                                                   | 1.26                                       |                            |             |             |
|                        | 16.46                          | 25.93                        | 19.93                           | 33.60                         | 22.90                         | 30.44                       |                        | 1.33                                       |                                                   | 1.69                                       |                            |             |             |
| <i>mean</i>            | <i>21.02</i>                   | <i>27.36</i>                 | <i>19.86</i>                    | <i>29.30</i>                  | <i>26.57</i>                  | <i>31.35</i>                | <i>1.07</i>            | <b>1.20</b>                                | <i>1.30</i>                                       | <i>1.47</i>                                | <i>1.34</i>                | <i>0.81</i> | <i>0.80</i> |

| <u>Experiment Code</u> | <u>UNINFECTED WELL, NO TNF</u> | <u>UNINFECTED WELL, +TNF</u> | <u>UNINFECTED CELLS, NO TNF</u> | <u>INFECTED CELLS, NO TNF</u> | <u>UNINFECTED CELLS, +TNF</u> | <u>INFECTED CELLS, +TNF</u> | <u>INF+TNF/INF-TNF</u> | <u>INF+TNF/Uninf+TNF within well ratio</u> | <u>UNINF+TNF/UNINF-TNF (ALL UNINFECTED WELLS)</u> | <u>INF-TNF/UNINF-TNF within well ratio</u> | <u>UNINF+TNF/UNINF-TNF</u> | <u>J/L</u> | <u>I/M</u> |
|------------------------|--------------------------------|------------------------------|---------------------------------|-------------------------------|-------------------------------|-----------------------------|------------------------|--------------------------------------------|---------------------------------------------------|--------------------------------------------|----------------------------|------------|------------|
| CMB031                 | 2.42                           | 13.54                        | 6.59                            | 15.17                         | 8.64                          | 20.78                       |                        | 2.41                                       |                                                   | 2.30                                       |                            |            |            |
|                        | 4.22                           | 7.20                         | -                               | -                             | 13.13                         | 23.34                       |                        | 1.78                                       |                                                   |                                            |                            |            |            |
| <i>mean</i>            | 3.32                           | 10.37                        | -                               | -                             | 10.89                         | 22.06                       | 1.45                   | 2.09                                       | 3.12                                              |                                            | 1.65                       | 0.91       | 0.88       |
| CMB040                 | 2.49                           | 3.44                         | 4.17                            | 7.69                          | 5.42                          | 5.95                        |                        | 1.10                                       |                                                   | 1.84                                       |                            |            |            |
|                        | 7.62                           | 2.09                         | 2.94                            | 11.54                         | 10.81                         | 15.46                       |                        | 1.43                                       |                                                   | 3.93                                       |                            |            |            |
| <i>mean</i>            | 5.06                           | 2.77                         | 3.56                            | 9.62                          | 8.12                          | 10.71                       | 1.11                   | 1.26                                       | 0.55                                              | 2.88                                       | 2.28                       | 0.44       | 0.49       |
| CMB075                 | 11.44                          | 10.61                        | 13.15                           | 24.27                         | 15.71                         | 49.40                       |                        | 3.14                                       |                                                   | 1.85                                       |                            |            |            |
|                        | 11.49                          | 9.26                         | 12.86                           | 34.88                         | 7.36                          | 25.71                       |                        | 3.49                                       |                                                   | 2.71                                       |                            |            |            |
|                        | 10.48                          | 18.13                        | 9.21                            | 15.69                         | 13.91                         | 32.50                       |                        | 2.34                                       |                                                   | 1.70                                       |                            |            |            |
| <i>mean</i>            | 11.14                          | 12.67                        | 11.74                           | 24.95                         | 12.33                         | 35.87                       | 1.44                   | 2.99                                       | 1.14                                              | 2.09                                       | 1.05                       | 1.43       | 1.37       |
| CMB076                 | 11.89                          | 7.25                         | 10.20                           | 22.90                         | 3.40                          | 14.90                       |                        | 4.38                                       |                                                   | 2.25                                       |                            |            |            |
|                        | 11.00                          | 8.05                         | 11.60                           | 16.10                         | 7.90                          | 31.40                       |                        | 3.97                                       |                                                   | 1.39                                       |                            |            |            |
|                        | 12.43                          | 14.12                        | 17.16                           | 28.40                         | 12.10                         | 43.10                       |                        | 3.56                                       |                                                   | 1.66                                       |                            |            |            |
| <i>mean</i>            | 11.77                          | 9.81                         | 12.99                           | 22.47                         | 7.80                          | 29.80                       | 1.33                   | 3.97                                       | 0.83                                              | 1.76                                       | 0.60                       | 2.25       | 2.21       |
| CMB077                 | 5.13                           | 4.56                         | 4.79                            | 7.09                          | 5.08                          | 13.60                       |                        | 2.68                                       |                                                   | 1.48                                       |                            |            |            |
| (Mtb infection)        | 4.38                           | 5.28                         | 5.36                            | 8.47                          | 6.47                          | 18.90                       |                        | 2.92                                       |                                                   | 1.58                                       |                            |            |            |
|                        | 2.65                           | 7.81                         | 3.94                            | 6.03                          | 3.70                          | 12.90                       |                        | 3.49                                       |                                                   | 1.53                                       |                            |            |            |
|                        | 5.01                           | 6.74                         | 3.08                            | 5.68                          | 5.01                          | 9.59                        |                        | 1.91                                       |                                                   | 1.84                                       |                            |            |            |
|                        | 4.25                           | 6.62                         | 5.05                            | 2.99                          | 7.66                          | 17.82                       |                        | 2.33                                       |                                                   | 0.59                                       |                            |            |            |
|                        | 5.59                           | 6.54                         | 4.23                            | 5.30                          | 5.12                          | 9.00                        |                        | 1.76                                       |                                                   | 1.25                                       |                            |            |            |
| <i>mean</i>            | 4.50                           | 6.26                         | 4.41                            | 5.93                          | 5.51                          | 13.64                       | 2.30                   | 2.51                                       | 1.39                                              | 1.38                                       | 1.25                       | 1.82       | 1.84       |
